# Supplementary material for: An agent based approach to the potential for rebound resulting from evolution of residential lighting technologies
Source: Springer Nature journal article supplement (doi:10.1007/s11367-013-0643-8), 2013-08-26
Supplement: MOESM2 [file 11367_2013_643_MOESM2_ESM.docx]

**Electronic Supplementary Material 2**

***Sensitivity Analysis***

***Rebound Percentage More***

A sensitivity analysis of ABM is presented and discussed with respect to additional light consumption and the failure rate of light bulbs. Figures B1 and B2 present the light and energy consumption impacts of five rebound scenarios. In the first agents use no more light when given the chance (Rebound 0), in the second they use 25% more hours of light given the opportunity (Rebound 25), 50% in the third (Rebound 50), 75% in the fourth (Rebound 75), and 100% in the last (Rebound 100).

**Fig. B1** Light consumption sensitivity based on rebound hours of use

**Fig. B2** Energy consumption sensitivity based on rebound hours of use

As expected, light and energy consumption increase as agents consume more hours of light. The initial decrease in energy consumption is due to a shift from incandescent lighting options to the more efficient lighting options of CFL and LED. Table B1 presents the light and energy consumption at 2030 from the five sensitivity scenarios presented here, along with the standard deviation of the five model runs.

**Table B1** Light and energy consumption at 2030

| Rebound Scenario | Household Light Consumption (Mlmhr) | Household Energy Consumption for Lighting (Kwhr) | Light Standard Deviation | Energy Standard Deviation |
| --- | --- | --- | --- | --- |
| Rebound 0 | 2.66 | 53.02 | 0.042 | 1.63 |
| Rebound 25 | 3.41 | 65.22 | 0.043 | 1.97 |
| Rebound 50 | 4.66 | 76.21 | 0.029 | 1.57 |
| Rebound 75 | 6.02 | 83.09 | 0.147 | 2.72 |
| Rebound 100 | 7.77 | 89.08 | 0.160 | 1.72 |

***Early Failure***

Both CFL (8,000 hours) and LED (25,000 hours) lighting options have extremely long rated lives in comparison to incandescent lighting options. The occurrence of early failure has the potential to greatly decrease the useful lifetime of the lighting options, thus resulting in greater rates of turnover than anticipated. From a sensitivity perspective, three types of early failure needs to be considered: CFL early failure, LED early failure, and combined CFL and LED early failure. It is most likely that some combination of both CFL and LED early failure will occur, however, by also studying the sensitivity of each lighting option separately greater understanding may be achieved. Figure B3 and B4 present the impact of early CFL failure on light and energy consumption. Five scenarios were generated with different levels of early CFL failure, from no CFLs failing early (CFL0) to 10% of the CFLs failing early (CFL10).

**Fig. B3** Light consumption as a function of early CFL failure

**Fig. B4** Energy consumption as a function of early CFL failure

Light and energy consumption is similar across the percentages ofearly CFL failure tested. Potentially, there could be an increase in the amount of light and energy consumed due to the premature and increased market turnover due to early bulb failure. Table B2 presents the light and energy consumption at 2030.

**Table B2** Light and energy consumption at 2030

| Rebound Scenario | Household Light Consumption (Mlmhr) | Household Energy Consumption for Lighting (Kwhr) | Light Standard Deviation | Energy Standard Deviation |
| --- | --- | --- | --- | --- |
| CFL 0 | 3.47 | 65.46 | 0.028 | 1.57 |
| CFL 1 | 3.41 | 65.23 | 0.058 | 2.00 |
| CFL5 | 3.43 | 64.75 | 0.058 | 2.02 |
| CFL 10 | 3.44 | 65.97 | 0.053 | 1.53 |

Values for light and energy consumption remain fairly constant across all four early CFL failure scenarios.

LED lighting options have estimated lifetimes far greater than that of an incandescent or CFL lighting option. Figures B5 and B6 present the light and energy consumption of different lighting scenarios when the LED failure rate is varied across five scenarios, ranging from an early failure rate of 0% (LED 0) to a rate of 10% (LED 10).

**Fig. B5** Light consumption as a function of early LED failure

**Fig. B6** Energy consumption as a function of early LED failure

The light and energy consumption increase slightly with the increased early failure rate of LED. This effect may be more pronounced with the LED bulbs due to their comparatively longer lifetime than the CFL bulbs. Early failure accelerates the market turnover rate, and in this ABM causes the agents to make more choices about the consumption of light and with which bulb to consume the light. Table B3 presents the light and energy consumption at 2030 as a function of the early LED burnout rate.

**Table B3** Light and energy consumption at 2030

| Rebound Scenario | Household Light Consumption (Mlmhr) | Household Energy Consumption for Lighting (Kwhr) | Light Standard Deviation | Energy Standard Deviation |
| --- | --- | --- | --- | --- |
| LED 0 | 3.47 | 66.05 | 0.037 | 1.53 |
| LED 1 | 3.45 | 65.74 | 0.065 | 0.95 |
| LED 5 | 3.49 | 67.32 | 0.057 | 1.70 |
| LED 10 | 3.49 | 67.32 | 0.057 | 1.70 |

The impact of early CFL and LED failure in terms of light and energy consumption are presented as Figures B7 and B8. It is more likely that some combination of both early CFL and LED failure will occur. Several different combinations are explored here, ranging from scenarios where there is no early failure, to 10% early failure of both lighting options. Five selected early failure scenarios are presented here to explore the contribution of each premature failure rate to energy and light consumption.

**Fig. B7** Light consumption as a function of early CFL and LED failure

**Fig. B8** Energy consumption as a function of early CFL and LED failure

Both light and energy consumption increase as a function of the premature market turnover due to the early failure rate of lighting options. Although both CFL and LED failure rates contribute to the increases in light and energy consumption, the early failure rate of LED has a greater influence than the early failure of CFL. This may be due to the comparatively longer life of LED options, and therefore the greater reduction in the percentage of the overall lifetime.

***Model Validation***

Validation of ABM is still in its relative infancy compared to deterministic modeling. One of the challenges in ABM validation is due to the inherent stochasticity present in these types of models. Another is due to the complex nature of the systems modeling using this methodology. To this effect it is almost impossible to reproduce ABM results without the use of a computer and the computer model. Patterns are commonly used in the validation of ABM, where multiple observed patterns are utilized as indicators of the model’s internal structure, and that the interactions occurring are as expected (Railsback and Grimm, 2012). One common question asked when utilizing patterns as indicators, is whether the model is behaving as expected, and can the results of the model and changes in the results be explained. This type of validation was applied to the ABM presented in this paper, where the actions of individual agents or households were observed along with the overall results, to determine the structural validity of the model presented.
